# Supplementary material for: A novel reporter allele for monitoring Dll4 expression within the embryonic and adult mouse
Source: PubMed Central journal article supplement (PMC5898260; doi:10.1242/bio.026799), 2018-02-08
Supplement: biolopen-7-026799-s1.pdf [file biolopen-7-026799-s1.pdf]

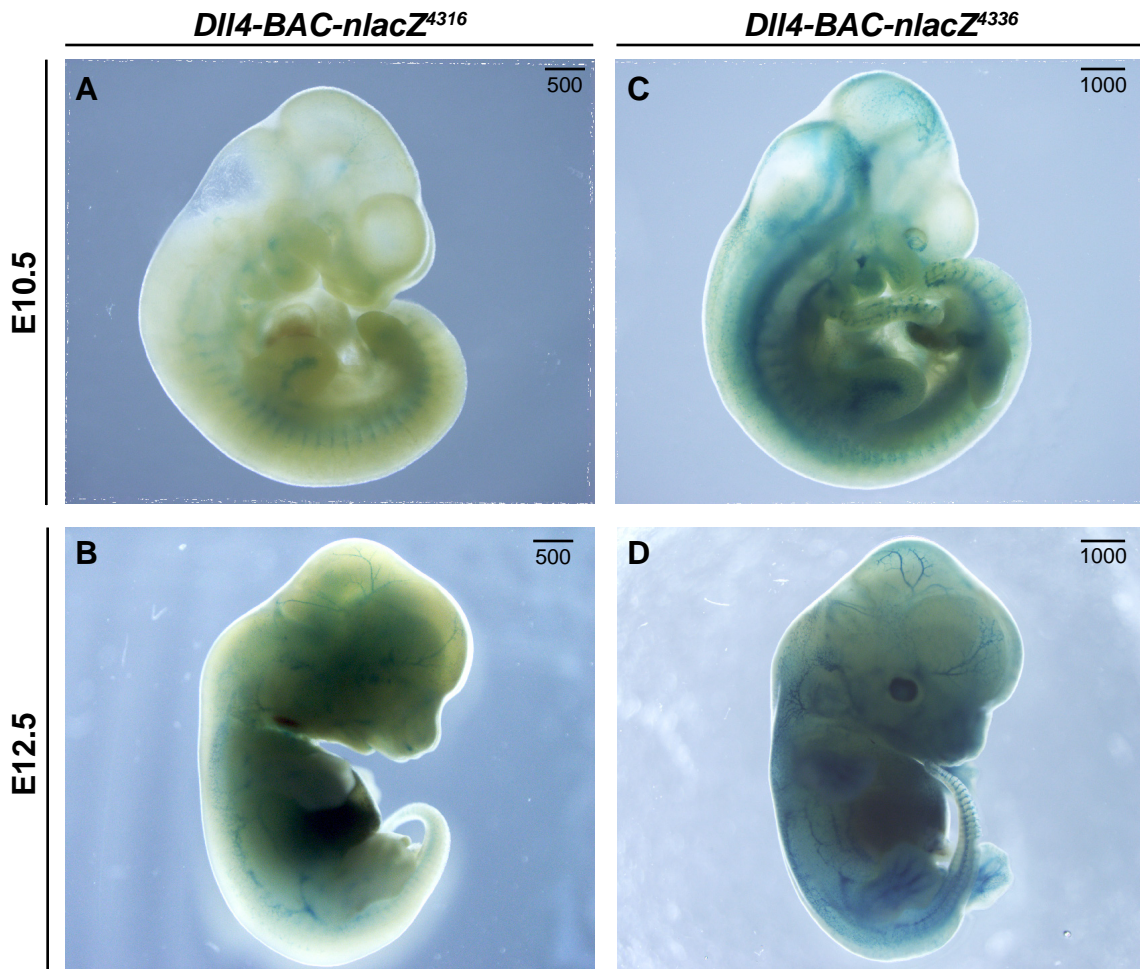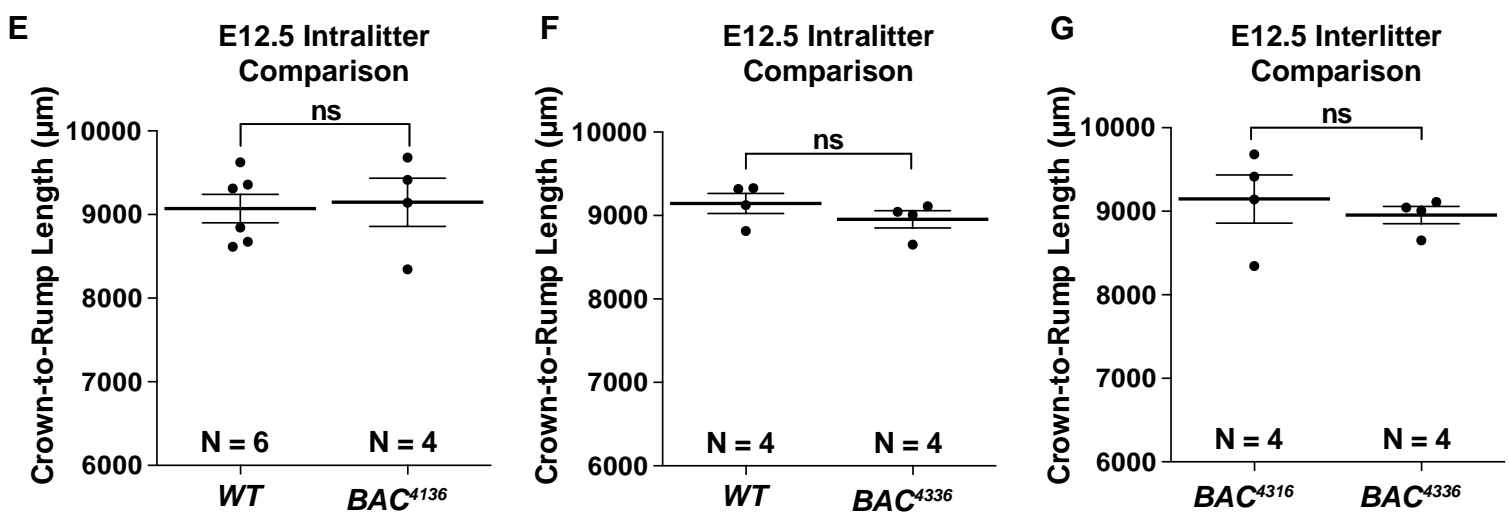

**H**

| Genotype        | <i>DII4<sup>LacZ/+</sup></i> | <i>DII4-BAC-nLacZ<sup>4336</sup></i> | <i>DII4-BAC-nLacZ<sup>4316</sup></i> |
|-----------------|------------------------------|--------------------------------------|--------------------------------------|
| Predicted LacZ+ | 50%                          | 50%                                  | 50%                                  |
| Observed LacZ+  | 35.76%                       | 48%                                  | 45%                                  |
| Total (n)       | 165                          | 128                                  | 58                                   |

**Figure S1: Viability assessment and comparative reporter expression between *Dll4-BAC-nLacZ*<sup>4316</sup> and *Dll4-BAC-nLacZ*<sup>4336</sup>.**

**A-B**, Representative wholemount images of stained E10.5 (A) or E12.5 (B) *Dll4-BAC-nLacZ*<sup>4316</sup> embryos. **C-D**, Representative wholemount images of stained E10.5 (C) or E12.5 (D) *Dll4-BAC-nLacZ*<sup>4336</sup> embryos. **E-G**, Body measurements at E12.5 between transgenic and non-transgenic 4316 littermates (E), 4336 littermates (F), or 4316 and 4336 transgenic animals (non-littermates) (G). **H**, Viability assessment between *Dll4*<sup>lacZ/+</sup> and both *Dll4-BAC-nLacZ* founder lines. All crosses were between heterozygous *Dll4* reporter animals and WT animals with an expected yield of 50% lacZ-positive offspring. Data is presented as an average  $\pm$  S.E.M. Comparisons were made by Student's T-Test. Scale bars depicted are in  $\mu\text{m}$ .

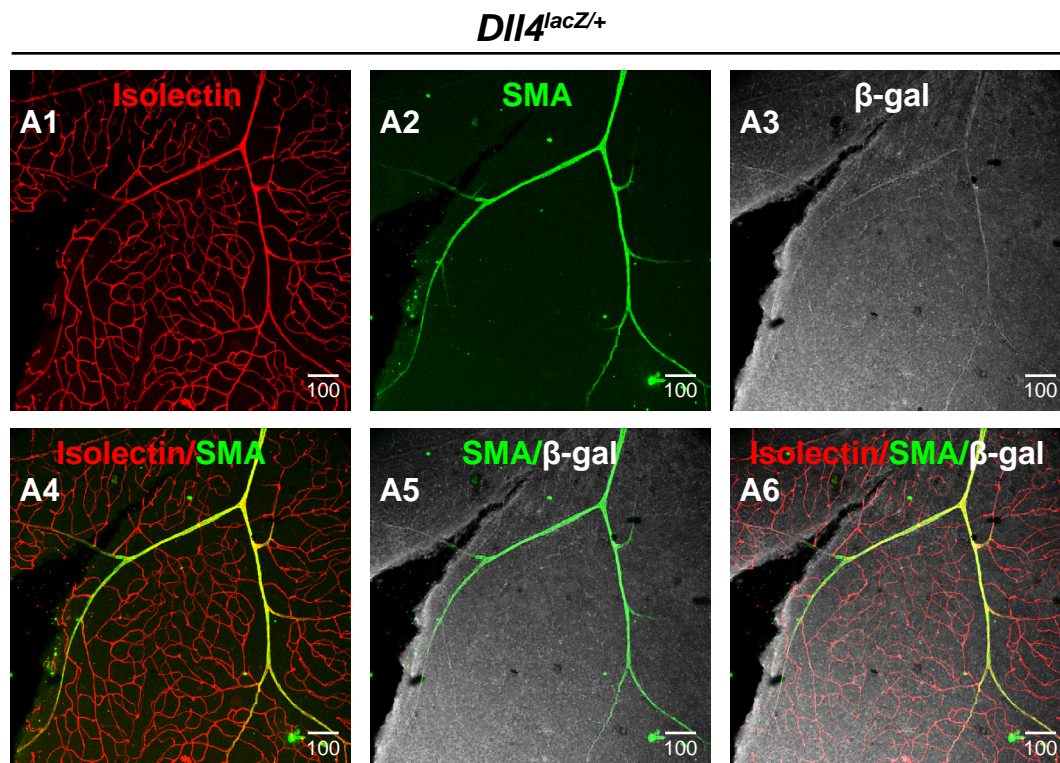

**Figure S2: Comparative *DII4* expression in postnatal and adult retinas.**

**A1-A6**, Immunohistochemistry and indirect immunofluorescent detection of isolectin B4 (A1), smooth muscle actin (SMA) (A2), β-gal (A3), and merged (A4-A6) images from representative *DII4<sup>lacZ/+</sup>* adult retinas. Scale bars depicted are in μm.
